# Supplementary material for: Weeding Through the Haze: A Survey on Cannabis Use Among People Living with Parkinson’s Disease in the US
Source: bioRxiv or medRxiv preprint supplement (doi:10.1101/2020.06.24.20139162), 2021-02-10
Supplement: Supplementary file [file 2020.06.24.20139162-1.pdf]

# Parkinson's Foundation Cannabis Survey 2020

Parkinson's disease (PD) is a neurodegenerative disease. It largely affects the aging population. The Parkinson's community has looked to marijuana or cannabis to provide some relief from both motor and non-motor symptoms. However, little is known about the effects of marijuana or cannabis for Parkinson's. Unknown information includes benefit to symptoms, potential side effects and safety issues.

The Parkinson's Foundation would now like to hear directly from people with Parkinson's disease about their:

Reasons for or against marijuana or cannabis use

Methods and frequency of marijuana or cannabis use

Benefits or risks of marijuana or cannabis use

The survey takes about 15 minutes to complete. Your participation is completely voluntary. All of your answers are anonymous. None of your answers will be connected to identifying information.

Click below to begin the survey.

If you have any questions or concerns, please contact Senior Manager, Community Engagement, Megan Feeney, MPH at 646-388-7674 or [survey@parkinson.org](mailto:survey@parkinson.org).

---

Are you a person with Parkinson's disease?

- Yes  
 No

---

Thank you for sharing your feedback. Unfortunately, this survey is only intended for people with Parkinson's to complete. Please reach out to Senior Manager, Community Engagement, Megan Feeney, MPH at 646-388-7674 or [survey@parkinson.org](mailto:survey@parkinson.org) with any questions.

## Marijuana or Cannabis Usage

Have you used marijuana or cannabis at least once in the past six months?

- Yes  
 No

What were your primary reasons for not using marijuana or cannabis in the past six months? Select up to three.

- Fear of potential side effects or adverse outcomes from using marijuana or cannabis  
 Cost of marijuana or cannabis  
 Lack of scientific evidence about benefits of using marijuana or cannabis  
 Stigma associated using marijuana or cannabis  
 Negative previous experience using marijuana or cannabis  
 Use discouraged by my health team  
 Other

What were your other reasons for not using marijuana or cannabis in the past six months?

\_\_\_\_\_

For which of the following reasons would you consider using marijuana or cannabis? Select up to three of the most influential reasons.

- Potential side effects and adverse outcomes of using marijuana or cannabis were better understood  
 The cost of marijuana or cannabis was partially or fully covered by health insurance  
 Scientific evidence supported the claimed benefits of using marijuana or cannabis  
 There was less stigma associated with using marijuana or cannabis  
 Your health team encouraged you to try marijuana or cannabis  
 Marijuana or cannabis was legalized in your state  
 Other

For what other reasons would you consider using marijuana or cannabis?

\_\_\_\_\_

When you used marijuana or cannabis during the past six months, was it usually:

- For PD related medical reasons (for example, to treat or decrease symptoms of PD)  
 For other medical reasons (for example, to treat or decrease symptoms of another health condition)  
 For nonmedical reasons (for example, recreational use)  
 For both medical and nonmedical reasons  
 Don't know/Not sure

Where did you learn about marijuana or cannabis use for these reasons?

- Doctor  
 Internet/News  
 Media/advertisements  
 PD foundation  
 PD support groups  
 Friends or other people with PD  
 Family  
 Other

Where else did you learn about marijuana or cannabis use for these reasons?

\_\_\_\_\_

Was marijuana or cannabis recommended to you by a licensed doctor or provider?

- Yes  
 No

---

Were you provided information about recommendations for marijuana or cannabis use (for example, dosage, type, frequency of use, where it can be accessed, etc.)?

- Yes  
 No

---

From whom were you provided information about recommendations for marijuana or cannabis use?

- My PD doctor  
 Another licensed doctor (for example, primary care physician)  
 Staff at a medical dispensary  
 Friends or other people with PD  
 Family  
 Other

---

From who else were you provided information about recommendations for marijuana or cannabis use?

\_\_\_\_\_

---

What is your primary reason for using marijuana or cannabis for PD?

- To improve specific PD symptoms  
 To improve PD symptoms in general  
 To decrease PD medication (i.e. Sinemet, Mirapex) side effects  
 I have no primary reason for using marijuana or cannabis for PD medical reasons

---

For what medical condition do you primarily use marijuana or cannabis?

\_\_\_\_\_

---

What kind of marijuana or cannabis user would you consider yourself to be?

- Regular user  
 Occasional or "as needed" user

---

In the past six months, which of the following best captures your average frequency of marijuana or cannabis use?

- Never  
 Less than one day per month  
 One to three days per month  
 One to three days per week  
 Four to six days per week  
 Once per day  
 Multiple times per day

---

Is there a particular time of day you most often use marijuana or cannabis?

- Morning  
 Afternoon  
 Evening  
 Bedtime  
 I use marijuana or cannabis multiple times per day  
 I use marijuana or cannabis at random times throughout the day  
 I use marijuana when specific symptoms appear  
 Don't know/Not sure

---

During the past six months, which one of the following ways did you use marijuana or cannabis the most often? Did you usually...

- Smoke it  
 Vaporize it  
 Dab it (for example, using waxes or concentrates)  
 Eat or swallow it (for example, edibles or capsules)  
 Drink it (for example, in tea)  
 Spray or drop it under tongue (for example, sublingual drops or dissolvable strips)  
 Topically apply it (for example, creams or lotions)  
 Wear it (for example, patch)  
 Use it some other way  
 Don't know/not sure

---

What other way did you use marijuana or cannabis the most often?

---

\_\_\_\_\_

---

Where do you most often get your marijuana or cannabis from?

- Grow it myself
- Medical dispensary
- Recreational dispensary
- Underground market/ dealer
- Home delivery
- Family member/Friend

---

What type of marijuana or cannabis do you most often use?

- High THC content
- Low THC content
- Pure CBD
- High CBD content
- Low CBD content
- Similar or equal mix of THC and CBD
- Other
- Don't know

---

What other type of marijuana or cannabis do you most often use?

---

\_\_\_\_\_

---

What is the specific type of marijuana or cannabis you most often use (for example, street name or brand name)? If you do not know, please write "Don't know."

---

\_\_\_\_\_

---

What is the specific dosage or potency of marijuana or cannabis you most often use? If you do not know, please write "Don't know."

---

\_\_\_\_\_

## Intended Symptoms and Side Effects to Treat and Associated Outcomes

For which of the following symptoms do you use marijuana or cannabis to improve? Select all that apply.

- Appetite
- Pain
- Nausea
- Anxiety
- Tremor
- Stiffness
- Dyskinesias
- Depression
- Fatigue
- Freezing
- Constipation
- Motivation
- Sleepiness (daytime)
- Sleep disorders
- Dystonia
- Bradykinesia (slowness of movement)
- Urinary symptoms
- Balance
- Forgetfulness
- Difficulty planning and/or multi-tasking
- Hallucinations
- My PD symptom is not listed on this list.
- I do not use marijuana or cannabis for specific PD symptoms

For what other symptom do you use marijuana or cannabis to improve? \_\_\_\_\_

To what extent do you feel that marijuana or cannabis improved the severity of appetite loss?

- Considerable improvement
- Moderate improvement
- Slight improvement
- No improvement
- Worsening of symptoms

Were these changes meaningful to your quality of life?

- Yes
- No
- Don't know

To what extent do you feel that marijuana or cannabis improved the severity of pain?

- Considerable improvement
- Moderate improvement
- Slight improvement
- No improvement
- Worsening of symptoms

Were these changes meaningful to your quality of life?

- Yes
- No
- Don't know

To what extent do you feel that marijuana or cannabis improved the severity of nausea?

- Considerable improvement
- Moderate improvement
- Slight improvement
- No improvement
- Worsening of symptoms

Were these changes meaningful to your quality of life?

- Yes
- No
- Don't know

---

To what extent do you feel that marijuana or cannabis improved the severity of anxiety?

- Considerable improvement
- Moderate improvement
- Slight improvement
- No improvement
- Worsening of symptoms

---

Were these changes meaningful to your quality of life?

- Yes
- No
- Don't know

---

To what extent do you feel that marijuana or cannabis improved the severity of tremor?

- Considerable improvement
- Moderate improvement
- Slight improvement
- No improvement
- Worsening of symptoms

---

Were these changes meaningful to your quality of life?

- Yes
- No
- Don't know

---

To what extent do you feel that marijuana or cannabis improved the severity of stiffness?

- Considerable improvement
- Moderate improvement
- Slight improvement
- No improvement
- Worsening of symptoms

---

Were these changes meaningful to your quality of life?

- Yes
- No
- Don't know

---

To what extent do you feel that marijuana or cannabis improved the severity of dyskinesias?

- Considerable improvement
- Moderate improvement
- Slight improvement
- No improvement
- Worsening of symptoms

---

Were these changes meaningful to your quality of life?

- Yes
- No
- Don't know

---

To what extent do you feel that marijuana or cannabis improved the severity of depression?

- Considerable improvement
- Moderate improvement
- Slight improvement
- No improvement
- Worsening of symptoms

---

Were these changes meaningful to your quality of life?

- Yes
- No
- Don't know

---

To what extent do you feel that marijuana or cannabis improved the severity of fatigue?

- Considerable improvement
- Moderate improvement
- Slight improvement
- No improvement
- Worsening of symptoms

---

Were these changes meaningful to your quality of life?

Yes  
 No  
 Don't know

---

To what extent do you feel that marijuana or cannabis improved the severity of freezing?

Considerable improvement  
 Moderate improvement  
 Slight improvement  
 No improvement  
 Worsening of symptoms

---

Were these changes meaningful to your quality of life?

Yes  
 No  
 Don't know

---

To what extent do you feel that marijuana or cannabis improved the severity of constipation?

Considerable improvement  
 Moderate improvement  
 Slight improvement  
 No improvement  
 Worsening of symptoms

---

Were these changes meaningful to your quality of life?

Yes  
 No  
 Don't know

---

To what extent do you feel that marijuana or cannabis improved the severity of motivation loss?

Considerable improvement  
 Moderate improvement  
 Slight improvement  
 No improvement  
 Worsening of symptoms

---

Were these changes meaningful to your quality of life?

Yes  
 No  
 Don't know

---

To what extent do you feel that marijuana or cannabis improved the severity of sleepiness (daytime)?

Considerable improvement  
 Moderate improvement  
 Slight improvement  
 No improvement  
 Worsening of symptoms

---

Were these changes meaningful to your quality of life?

Yes  
 No  
 Don't know

---

To what extent do you feel that marijuana or cannabis improved the severity of sleep disorders?

Considerable improvement  
 Moderate improvement  
 Slight improvement  
 No improvement  
 Worsening of symptoms

---

Were these changes meaningful to your quality of life?

Yes  
 No  
 Don't know

---

---

To what extent do you feel that marijuana or cannabis improved the severity of dystonia?

- Considerable improvement
- Moderate improvement
- Slight improvement
- No improvement
- Worsening of symptoms

---

Were these changes meaningful to your quality of life?

- Yes
- No
- Don't know

---

To what extent do you feel that marijuana or cannabis improved the severity of bradykinesia (slowness of movement)?

- Considerable improvement
- Moderate improvement
- Slight improvement
- No improvement
- Worsening of symptoms

---

Were these changes meaningful to your quality of life?

- Yes
- No
- Don't know

---

To what extent do you feel that marijuana or cannabis improved the severity of urinary symptoms?

- Considerable improvement
- Moderate improvement
- Slight improvement
- No improvement
- Worsening of symptoms

---

Were these changes meaningful to your quality of life?

- Yes
- No
- Don't know

---

To what extent do you feel that marijuana or cannabis improved the severity of balance loss?

- Considerable improvement
- Moderate improvement
- Slight improvement
- No improvement
- Worsening of symptoms

---

Were these changes meaningful to your quality of life?

- Yes
- No
- Don't know

---

To what extent do you feel that marijuana or cannabis improved the severity of forgetfulness?

- Considerable improvement
- Moderate improvement
- Slight improvement
- No improvement
- Worsening of symptoms

---

Were these changes meaningful to your quality of life?

- Yes
- No
- Don't know

---

To what extent do you feel that marijuana or cannabis improved the severity of difficulty planning and/or multi-tasking?

- Considerable improvement
- Moderate improvement
- Slight improvement
- No improvement
- Worsening of symptoms



---

Were these changes meaningful to your quality of life?

Yes  
 No  
 Don't know

---

To what extent do you feel that marijuana or cannabis improved the severity of hallucinations?

Considerable improvement  
 Moderate improvement  
 Slight improvement  
 No improvement  
 Worsening of symptoms

---

Were these changes meaningful to your quality of life?

Yes  
 No  
 Don't know

---

To what extent do you feel that marijuana or cannabis improved the severity of this other symptom?

Considerable improvement  
 Moderate improvement  
 Slight improvement  
 No improvement  
 Worsening of symptoms

---

Were these changes meaningful to your quality of life?

Yes  
 No  
 Don't know

---

To what extent do you feel that marijuana or cannabis improved the frequency of appetite loss?

Considerable improvement  
 Moderate improvement  
 Slight improvement  
 No improvement  
 Worsening of symptoms

---

Were these changes meaningful to your quality of life?

Yes  
 No  
 Don't know

---

To what extent do you feel that marijuana or cannabis improved the frequency of pain?

Considerable improvement  
 Moderate improvement  
 Slight improvement  
 No improvement  
 Worsening of symptoms

---

Were these changes meaningful to your quality of life?

Yes  
 No  
 Don't know

---

To what extent do you feel that marijuana or cannabis improved the frequency of nausea?

Considerable improvement  
 Moderate improvement  
 Slight improvement  
 No improvement  
 Worsening of symptoms

---

Were these changes meaningful to your quality of life?

Yes  
 No  
 Don't know

---

To what extent do you feel that marijuana or cannabis improved the frequency of anxiety?

- Considerable improvement
- Moderate improvement
- Slight improvement
- No improvement
- Worsening of symptoms

---

Were these changes meaningful to your quality of life?

- Yes
- No
- Don't know

---

To what extent do you feel that marijuana or cannabis improved the frequency of tremor?

- Considerable improvement
- Moderate improvement
- Slight improvement
- No improvement
- Worsening of symptoms

---

Were these changes meaningful to your quality of life?

- Yes
- No
- Don't know

---

To what extent do you feel that marijuana or cannabis improved the frequency of stiffness?

- Considerable improvement
- Moderate improvement
- Slight improvement
- No improvement
- Worsening of symptoms

---

Were these changes meaningful to your quality of life?

- Yes
- No
- Don't know

---

To what extent do you feel that marijuana or cannabis improved the frequency of dyskinesias?

- Considerable improvement
- Moderate improvement
- Slight improvement
- No improvement
- Worsening of symptoms

---

Were these changes meaningful to your quality of life?

- Yes
- No
- Don't know

---

To what extent do you feel that marijuana or cannabis improved the frequency of depression?

- Considerable improvement
- Moderate improvement
- Slight improvement
- No improvement
- Worsening of symptoms

---

Were these changes meaningful to your quality of life?

- Yes
- No
- Don't know

---

To what extent do you feel that marijuana or cannabis improved the frequency of fatigue?

- Considerable improvement
- Moderate improvement
- Slight improvement
- No improvement
- Worsening of symptoms

---

Were these changes meaningful to your quality of life?

- Yes  
 No  
 Don't know
- 

To what extent do you feel that marijuana or cannabis improved the frequency of freezing?

- Considerable improvement  
 Moderate improvement  
 Slight improvement  
 No improvement  
 Worsening of symptoms
- 

Were these changes meaningful to your quality of life?

- Yes  
 No  
 Don't know
- 

To what extent do you feel that marijuana or cannabis improved the frequency of constipation?

- Considerable improvement  
 Moderate improvement  
 Slight improvement  
 No improvement  
 Worsening of symptoms
- 

Were these changes meaningful to your quality of life?

- Yes  
 No  
 Don't know
- 

To what extent do you feel that marijuana or cannabis improved the frequency of motivation loss?

- Considerable improvement  
 Moderate improvement  
 Slight improvement  
 No improvement  
 Worsening of symptoms
- 

Were these changes meaningful to your quality of life?

- Yes  
 No  
 Don't know
- 

To what extent do you feel that marijuana or cannabis improved the frequency of sleepiness (daytime)?

- Considerable improvement  
 Moderate improvement  
 Slight improvement  
 No improvement  
 Worsening of symptoms
- 

Were these changes meaningful to your quality of life?

- Yes  
 No  
 Don't know
- 

To what extent do you feel that marijuana or cannabis improved the frequency of sleep disorders?

- Considerable improvement  
 Moderate improvement  
 Slight improvement  
 No improvement  
 Worsening of symptoms
- 

Were these changes meaningful to your quality of life?

- Yes  
 No  
 Don't know

---

To what extent do you feel that marijuana or cannabis improved the frequency of dystonia?

- Considerable improvement
- Moderate improvement
- Slight improvement
- No improvement
- Worsening of symptoms

---

Were these changes meaningful to your quality of life?

- Yes
- No
- Don't know

---

To what extent do you feel that marijuana or cannabis improved the frequency of bradykinesia (slowness of movement)?

- Considerable improvement
- Moderate improvement
- Slight improvement
- No improvement
- Worsening of symptoms

---

Were these changes meaningful to your quality of life?

- Yes
- No
- Don't know

---

To what extent do you feel that marijuana or cannabis improved the frequency of urinary symptoms?

- Considerable improvement
- Moderate improvement
- Slight improvement
- No improvement
- Worsening of symptoms

---

Were these changes meaningful to your quality of life?

- Yes
- No
- Don't know

---

To what extent do you feel that marijuana or cannabis improved the frequency of balance loss?

- Considerable improvement
- Moderate improvement
- Slight improvement
- No improvement
- Worsening of symptoms

---

Were these changes meaningful to your quality of life?

- Yes
- No
- Don't know

---

To what extent do you feel that marijuana or cannabis improved the frequency of forgetfulness?

- Considerable improvement
- Moderate improvement
- Slight improvement
- No improvement
- Worsening of symptoms

---

Were these changes meaningful to your quality of life?

- Yes
- No
- Don't know

---

To what extent do you feel that marijuana or cannabis improved the frequency of difficulty planning and/or multi-tasking?

- Considerable improvement
- Moderate improvement
- Slight improvement
- No improvement
- Worsening of symptoms

---

Were these changes meaningful to your quality of life?

- Yes  
 No  
 Don't know
- 

To what extent do you feel that marijuana or cannabis improved the frequency of hallucinations?

- Considerable improvement  
 Moderate improvement  
 Slight improvement  
 No improvement  
 Worsening of symptoms
- 

Were these changes meaningful to your quality of life?

- Yes  
 No  
 Don't know
- 

To what extent do you feel that marijuana or cannabis improved the frequency of this other symptom?

- Considerable improvement  
 Moderate improvement  
 Slight improvement  
 No improvement  
 Worsening of symptoms
- 

Were these changes meaningful to your quality of life?

- Yes  
 No  
 Don't know
- 

For which of the following medication side effects do you use marijuana or cannabis to decrease? Select all that apply.

- Anxiety  
 Nausea/ Vomiting  
 Lightheadedness  
 Loss of appetite  
 Low blood pressure  
 Confusion  
 Hallucinations  
 Dyskinesia  
 Gastrointestinal issues  
 My medication side effect is not listed on this list
- 

For what other medication side effect do you use marijuana or cannabis to decrease? \_\_\_\_\_

---

To what extent do you feel that marijuana or cannabis decreased the severity of anxiety?

- Considerable decrease  
 Moderate decrease  
 Slight decrease  
 No decrease  
 Worsening of side effects
- 

Were these changes meaningful to your quality of life?

- Yes  
 No  
 Don't know
- 

To what extent do you feel that marijuana or cannabis decreased the severity of nausea/vomiting?

- Considerable decrease  
 Moderate decrease  
 Slight decrease  
 No decrease  
 Worsening of side effects
- 

Were these changes meaningful to your quality of life?

- Yes  
 No  
 Don't know
-

---

To what extent do you feel that marijuana or cannabis decreased the severity of lightheadedness?

- Considerable decrease
- Moderate decrease
- Slight decrease
- No decrease
- Worsening of side effects

---

Were these changes meaningful to your quality of life?

- Yes
- No
- Don't know

---

To what extent do you feel that marijuana or cannabis decreased the severity of loss of appetite?

- Considerable decrease
- Moderate decrease
- Slight decrease
- No decrease
- Worsening of side effects

---

Were these changes meaningful to your quality of life?

- Yes
- No
- Don't know

---

To what extent do you feel that marijuana or cannabis decreased the severity of low blood pressure?

- Considerable decrease
- Moderate decrease
- Slight decrease
- No decrease
- Worsening of side effects

---

Were these changes meaningful to your quality of life?

- Yes
- No
- Don't know

---

To what extent do you feel that marijuana or cannabis decreased the severity of confusion?

- Considerable decrease
- Moderate decrease
- Slight decrease
- No decrease
- Worsening of side effects

---

Were these changes meaningful to your quality of life?

- Yes
- No
- Don't know

---

To what extent do you feel that marijuana or cannabis decreased the severity of hallucinations?

- Considerable decrease
- Moderate decrease
- Slight decrease
- No decrease
- Worsening of side effects

---

Were these changes meaningful to your quality of life?

- Yes
- No
- Don't know

---

To what extent do you feel that marijuana or cannabis decreased the severity of dyskinesia?

- Considerable decrease
- Moderate decrease
- Slight decrease
- No decrease
- Worsening of side effects

---

Were these changes meaningful to your quality of life?

- Yes  
 No  
 Don't know
- 

To what extent do you feel that marijuana or cannabis decreased the severity of gastrointestinal issues?

- Considerable decrease  
 Moderate decrease  
 Slight decrease  
 No decrease  
 Worsening of side effects
- 

Were these changes meaningful to your quality of life?

- Yes  
 No  
 Don't know
- 

To what extent do you feel that marijuana or cannabis decreased the severity of this other side effect?

- Considerable decrease  
 Moderate decrease  
 Slight decrease  
 No decrease  
 Worsening of side effects
- 

Were these changes meaningful to your quality of life?

- Yes  
 No  
 Don't know
- 

To what extent do you feel that marijuana or cannabis decreased the frequency of anxiety?

- Considerable decrease  
 Moderate decrease  
 Slight decrease  
 No decrease  
 Worsening of side effects
- 

Were these changes meaningful to your quality of life?

- Yes  
 No  
 Don't know
- 

To what extent do you feel that marijuana or cannabis decreased the frequency of this other side effect?

- Considerable decrease  
 Moderate decrease  
 Slight decrease  
 No decrease  
 Worsening of side effects
- 

Were these changes meaningful to your quality of life?

- Yes  
 No  
 Don't know
- 

To what extent do you feel that marijuana or cannabis decreased the frequency of nausea/vomiting?

- Considerable decrease  
 Moderate decrease  
 Slight decrease  
 No decrease  
 Worsening of side effects
- 

Were these changes meaningful to your quality of life?

- Yes  
 No  
 Don't know

---

To what extent do you feel that marijuana or cannabis decreased the frequency of lightheadedness?

- Considerable decrease
- Moderate decrease
- Slight decrease
- No decrease
- Worsening of side effects

---

Were these changes meaningful to your quality of life?

- Yes
- No
- Don't know

---

To what extent do you feel that marijuana or cannabis decreased the frequency of loss of appetite?

- Considerable decrease
- Moderate decrease
- Slight decrease
- No decrease
- Worsening of side effects

---

Were these changes meaningful to your quality of life?

- Yes
- No
- Don't know

---

To what extent do you feel that marijuana or cannabis decreased the frequency of low blood pressure?

- Considerable decrease
- Moderate decrease
- Slight decrease
- No decrease
- Worsening of side effects

---

Were these changes meaningful to your quality of life?

- Yes
- No
- Don't know

---

To what extent do you feel that marijuana or cannabis decreased the frequency of confusion?

- Considerable decrease
- Moderate decrease
- Slight decrease
- No decrease
- Worsening of side effects

---

Were these changes meaningful to your quality of life?

- Yes
- No
- Don't know

---

To what extent do you feel that marijuana or cannabis decreased the frequency of hallucinations?

- Considerable decrease
- Moderate decrease
- Slight decrease
- No decrease
- Worsening of side effects

---

Were these changes meaningful to your quality of life?

- Yes
- No
- Don't know

---

To what extent do you feel that marijuana or cannabis decreased the frequency of dyskinesia?

- Considerable decrease
- Moderate decrease
- Slight decrease
- No decrease
- Worsening of side effects



---

Were these changes meaningful to your quality of life?

- Yes  
 No  
 Don't know
- 

To what extent do you feel that marijuana or cannabis decreased the frequency of gastrointestinal issues?

- Considerable decrease  
 Moderate decrease  
 Slight decrease  
 No decrease  
 Worsening of side effects
- 

Were these changes meaningful to your quality of life?

- Yes  
 No  
 Don't know
- 

Do you feel that marijuana or cannabis adequately address your PD motor symptoms?

- Completely address  
 Mostly address  
 Somewhat address  
 Do not address
- 

Do you feel that marijuana or cannabis adequately address your PD non-motor symptoms?

- Completely address  
 Mostly address  
 Somewhat address  
 Do not address
- 

Have you experienced any negative side effects to marijuana or cannabis use?

- Yes  
 No
- 

What side effects did you experience when using marijuana or cannabis? Select all that apply.

- Anxiety/paranoia  
 Hallucinations/psychosis  
 Loss of motivation/ apathy  
 Depression  
 Forgetfulness  
 Cough  
 Nausea  
 Stomach pain  
 Weight gain  
 Increased heart rate  
 Impaired coordination  
 Loss of balance/falls  
 Dizziness  
 A side effect that is not listed on this list
- 

What side effect did you experience that was not on the list?

\_\_\_\_\_

---

Other than side effects, have you experienced any negative consequences to marijuana or cannabis use?

\_\_\_\_\_

---

In the past six months, have you stopped using marijuana or cannabis?

- Yes  
 No

---

For what reason did you stop using marijuana or cannabis? Select all that apply.

- My symptoms did not improve while using marijuana or cannabis
- My symptoms became worse while using marijuana or cannabis
- My prescription medication side effects did not improve while using marijuana or cannabis
- I changed my prescription medications
- I experienced unwanted side effects while using marijuana or cannabis
- The cost of marijuana or cannabis was too expensive
- I was unable to access or acquire marijuana or cannabis
- I was uncomfortable with the stigma of using marijuana or cannabis
- I felt that I was developing a dependency to marijuana or cannabis
- My health team discouraged me from using marijuana or cannabis
- Other

---

For what reason other did you stop using marijuana or cannabis?

---

---

What does using marijuana or cannabis allow you to do that you could not do otherwise?

---

---

What were your reasons for trying marijuana or cannabis to treat your Parkinson's disease over other alternative therapies?

---

**Prescription Medication Satisfaction**

Do you feel that your prescribed PD medications (i.e. Sinemet, Mirapex) adequately address the motor aspects of your Parkinson's disease?

- Completely address
- Mostly address
- Somewhat address
- Do not address
- Not currently taking medications for PD

Do you feel that your prescription medications (PD medications or other prescription medications) adequately address the non-motor aspects of your Parkinson's disease?

- Completely address
- Mostly address
- Somewhat address
- Do not address
- Not currently taking medications for PD

Were you concerned about potential interactions between your prescribed PD medications and marijuana or cannabis?

- Not concerned
- Somewhat concerned
- Very concerned

When you began using marijuana or cannabis, did you think that it would be a replacement for PD prescription drugs?

- Yes
- No

Has your experience with marijuana or cannabis impacted your use of PD prescription drugs?

- Eliminated the use for PD prescription drugs
- Significantly reduced the use of PD prescription drugs
- Reduced the use of PD prescription drugs
- Has had no impact on the use of PD prescription drugs
- Increased the use of PD prescription drugs

**Clinical Trial Interest**

Would you be interested in learning more information about a clinical trial exploring the impact of marijuana or cannabis on Parkinson's disease symptoms?

- Yes  
 No

Would you be interested in enrolling in a clinical trial exploring the impact of marijuana or cannabis on Parkinson's disease symptoms?

- Yes  
 No

Have you previously participated in a survey about cannabis usage for Fox Insight?

- Yes  
 No

**Demographic Information**

---

In what year were you born?

- Prior to 1920
- 1920
- 1921
- 1922
- 1923
- 1924
- 1925
- 1926
- 1927
- 1928
- 1929
- 1930
- 1931
- 1932
- 1933
- 1934
- 1935
- 1936
- 1937
- 1938
- 1939
- 1940
- 1941
- 1942
- 1943
- 1944
- 1945
- 1946
- 1947
- 1948
- 1949
- 1950
- 1951
- 1952
- 1953
- 1954
- 1955
- 1956
- 1957
- 1958
- 1959
- 1960
- 1961
- 1962
- 1963
- 1964
- 1965
- 1966
- 1967
- 1968
- 1969
- 1970
- 1971
- 1972
- 1973
- 1974
- 1975
- 1976
- 1977
- 1978
- 1979
- 1980
- 1981
- 1982
- 1983
- 1984
- 1985
- 1986
- 1987

- 1988
- 1989
- 1990
- 1991
- 1992
- 1993
- 1994
- 1995
- 1996
- 1997
- 1998
- 1999
- 2000
- 2001
- 2002
- 2003
- 2004
- 2005
- 2006
- 2007
- 2008
- 2009
- 2010
- 2011
- 2012
- 2013
- 2014
- 2015
- 2016
- 2017
- 2018
- 2019

---

In what year were you diagnosed Parkinson's disease?

- Prior to 1940
- 1940
- 1941
- 1942
- 1943
- 1944
- 1945
- 1946
- 1947
- 1948
- 1949
- 1950
- 1951
- 1952
- 1953
- 1954
- 1955
- 1956
- 1957
- 1958
- 1959
- 1960
- 1961
- 1962
- 1963
- 1964
- 1965
- 1966
- 1967
- 1968
- 1969
- 1970
- 1971
- 1972
- 1973
- 1974
- 1975
- 1976
- 1977
- 1978
- 1979
- 1980
- 1981
- 1982
- 1983
- 1984
- 1985
- 1986
- 1987
- 1988
- 1989
- 1990
- 1991
- 1992
- 1993
- 1994
- 1995
- 1996
- 1997
- 1998
- 1999
- 2000
- 2001
- 2002
- 2003
- 2004
- 2005
- 2006
- 2007



- 2008
- 2009
- 2010
- 2011
- 2012
- 2013
- 2014
- 2015
- 2016
- 2017
- 2018
- 2019
- 2020

---

Is Parkinson's disease your primary health concern?

- Yes
- No

---

Do you have a care partner?

- Yes
- No

---

What is your marital status?

- Single (never married)
- Married or domestic partnership
- Separated
- Widowed
- Divorced

---

Please select the gender you identify with:

- Male
- Female
- Other
- Prefer to not answer

---

Please select the category that describes you.

- American Indian or Alaska Native
- Asian
- Black/African American
- Hispanic/Latino
- Native Hawaiian Pacific Islander
- White
- Mixed
- Some other race, ethnicity or origin
- Prefer to not answer

---

What other race, ethnicity or origin do you identify with?

\_\_\_\_\_

---

What is your current employment status?

- Employed full time
- Employed part time
- Self-employed
- Unemployed
- Retired
- Unable to work

---

What is your highest level of education?

- Less than a high school diploma
- High school degree or equivalent (e.g. GED)
- Some college, no degree
- Trade/technical school (vocational training)
- Associate degree (e.g. AA, AS)
- Bachelor's degree (e.g. BA, BS)
- Master's degree (e.g. MA, MS, MEd)
- Professional degree (e.g. MD, DDS, DVM)
- Doctorate (e.g. PhD, EdD)

---

What is your current yearly household income?  
(include income from Social Security, investment,  
etc.):

- Less than \$25,000
- \$25,000 to \$34,999
- \$35,000 to \$49,999
- \$50,000 to \$74,999
- \$75,000 to \$99,999
- \$100,000 to \$149,999
- \$150,000 to \$199,999
- \$200,000 or more
- Prefer not to say

---

Please enter the first three numbers of your zip  
code. For example, if your zip code is 07042, please  
enter 070.

---
